# Supplementary material for: Superior thermoelasticity and shape-memory nanopores in a porous supramolecular organic framework
Source: PubMed Central journal article supplement (PMC4865851; doi:10.1038/ncomms11564), 2016-05-11
Supplement: ncomms11564-s1.pdf [file ncomms11564-s1.pdf]

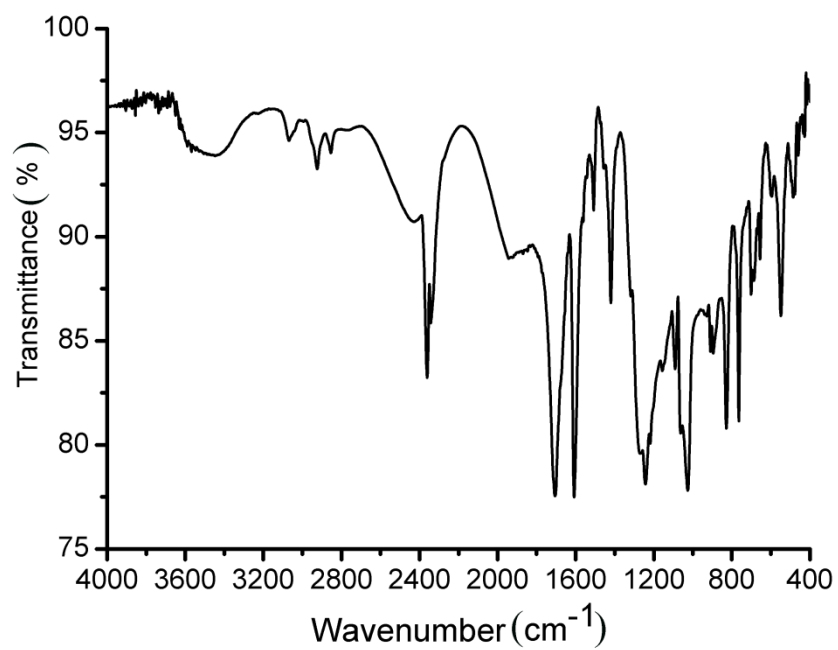

**Supplementary Figure 1.** IR spectrum for compound **1o**·0.33DMF.

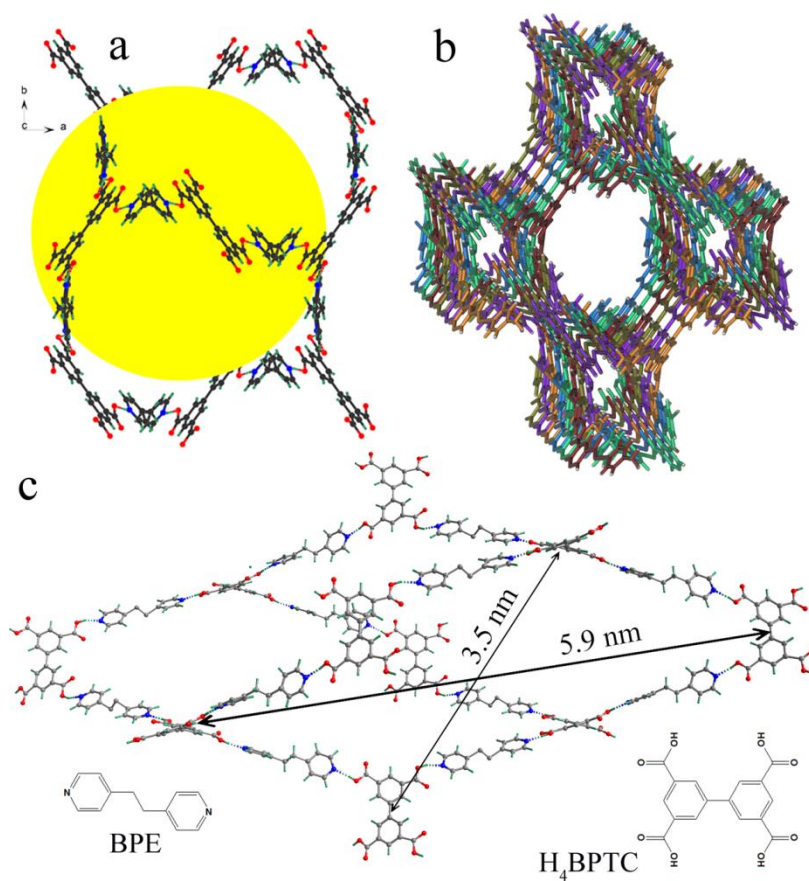

**Supplementary Figure 2.** **a**, The colossal adamantine cage assembled by four helicates in compound **10**·0.33DMF; **b**, six single *dia* frameworks interpenetrate in parallel along the *c*-axis, forming the sextuple interpenetrated *dia* framework; **c**, the colossal adamantine cage showing huge windows ( $5.9 \times 3.5 \text{ nm}^2$ ), and molecular structures of BPE and H<sub>4</sub>BPTC.

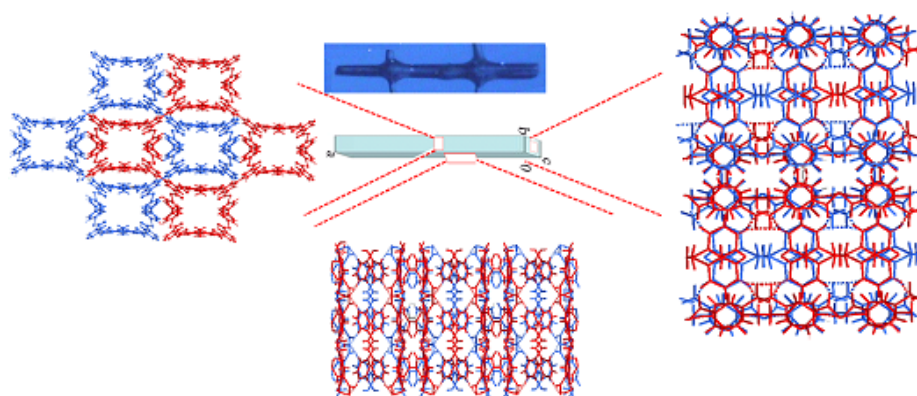

**Supplementary Figure 3.** Panoramic view of the crystal structure for compound **1o**-0.33DMF.

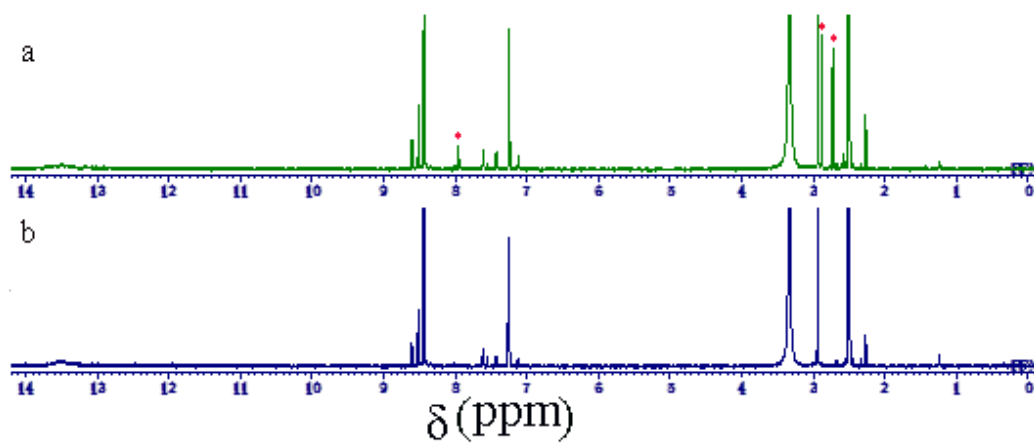

**Supplementary Figure 4.** **a**, <sup>1</sup>H NMR (400 MHz, DMSO-*d*<sub>6</sub>) for as-prepared compound **1o**·0.33DMF; **b**, <sup>1</sup>H NMR for compound **1o** generated by desolvation under vacuum at 60 °C. The chemical shifts of DMF,  $\delta = 2.73, 2.89$  and  $7.95$  ppm, are quite apparent for the as-prepared compound **1o**·0.33DMF, whereas they are almost invisible for compound **1o**. This implies that DMF was completely removed in compound **1o**.

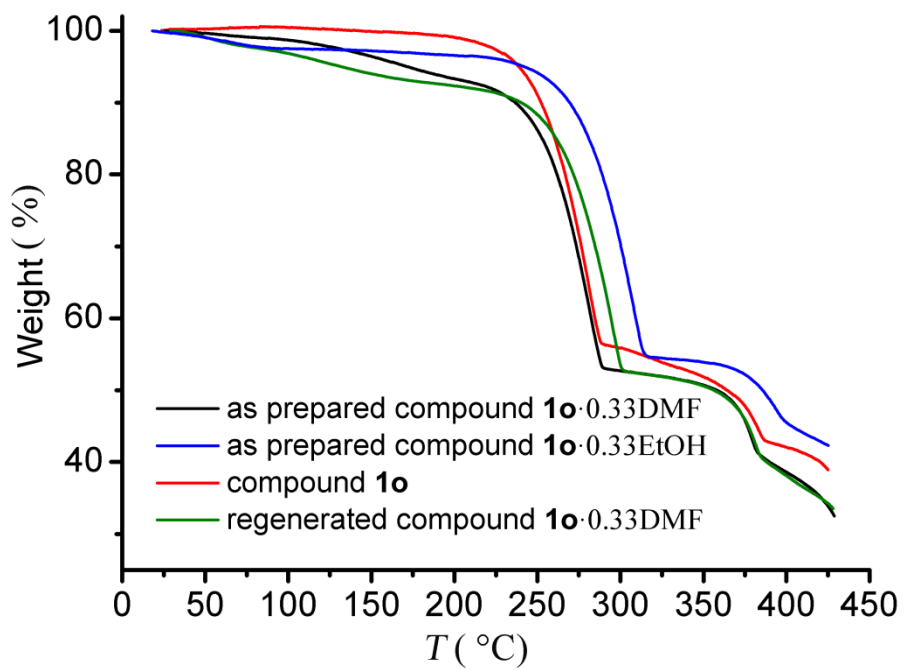

**Supplementary Figure 5.** TGA traces for compound **1o**·0.33DMF, compound **1o**·0.33EtOH, compound **1o**, and regenerated compound **1o**·0.33DMF.

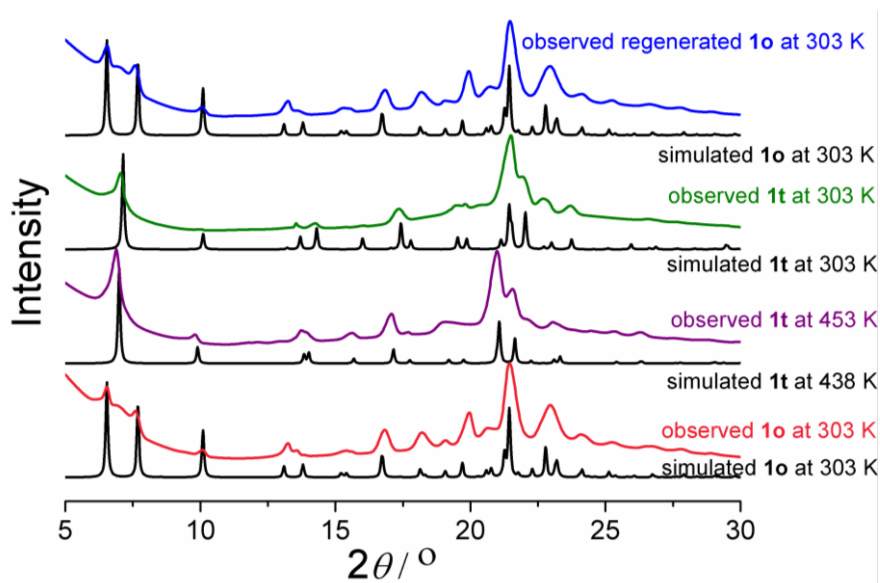

**Supplementary Figure 6.** PXRD patterns of compound **1o**, compound **1t**, and regenerated compound **1o** compared with patterns simulated from single-crystal structures.

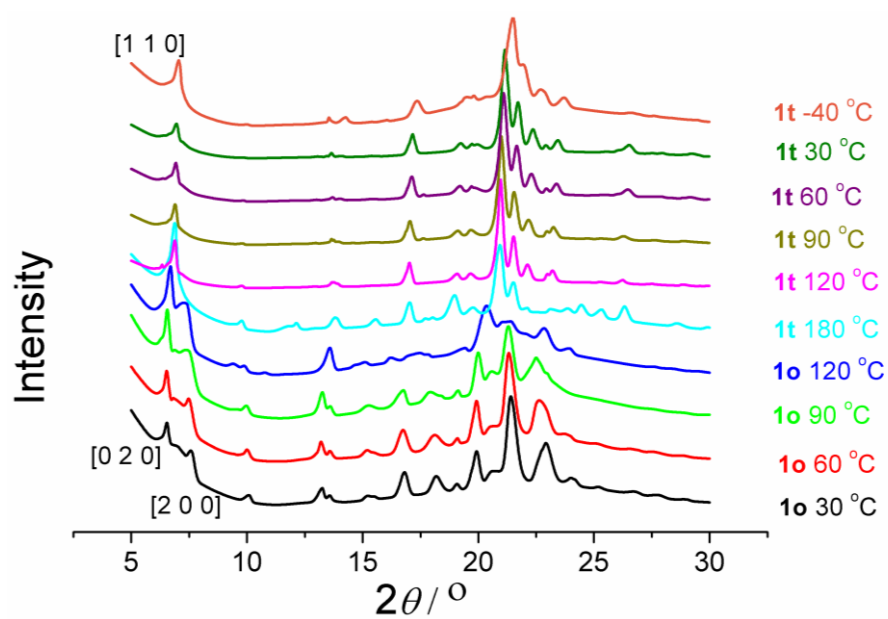

**Supplementary Figure 7.** PXRD pattern evolution of desolvated **1o**·0.33 DMF, showing the irreversible structural transition from compound **1o** to compound **1t**.

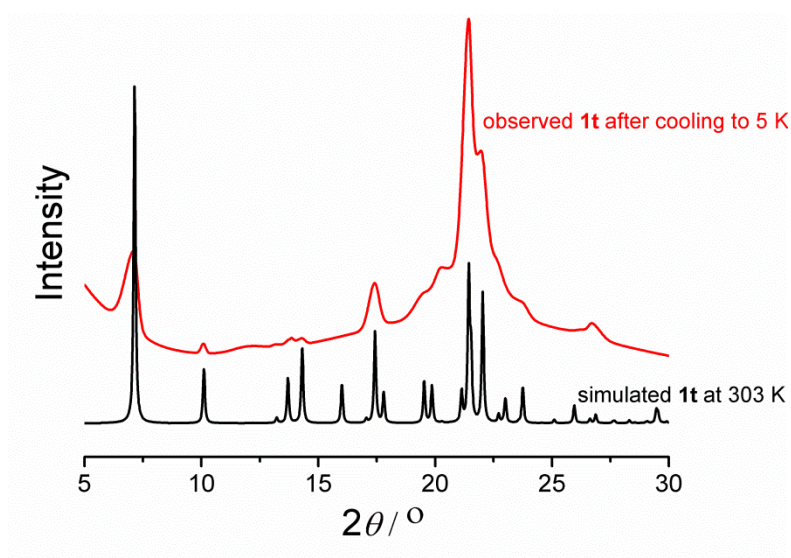

**Supplementary Figure 8.** PXRD pattern of compound **1t** pre-cooled at 5 K, the experimental pattern was measured at 303 K.



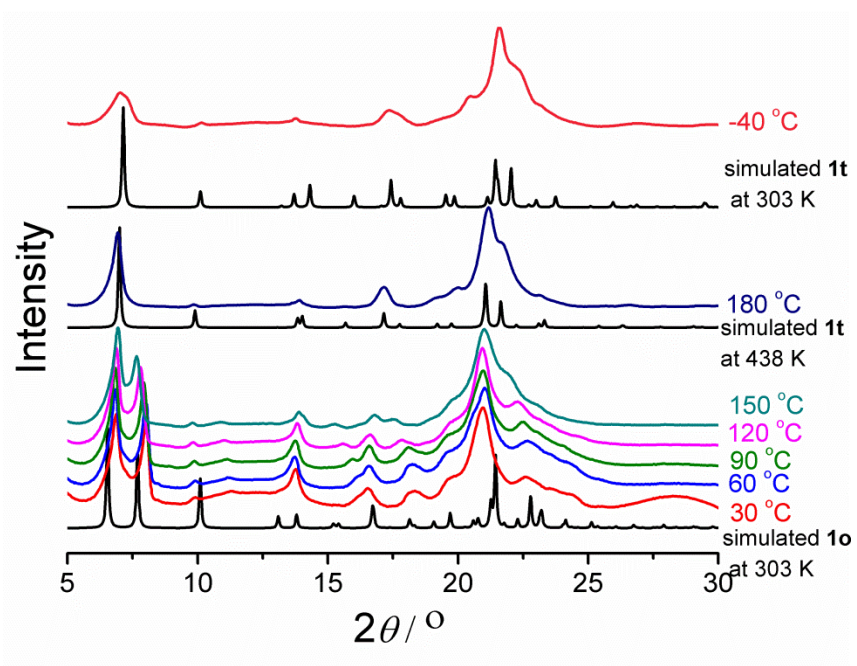

**Supplementary Figure 9.** PXRD pattern evolution of desolvated compound **1o**-0.33EtOH, showing the thermally irreversible structural transition from compound **1o** to compound **1t**.

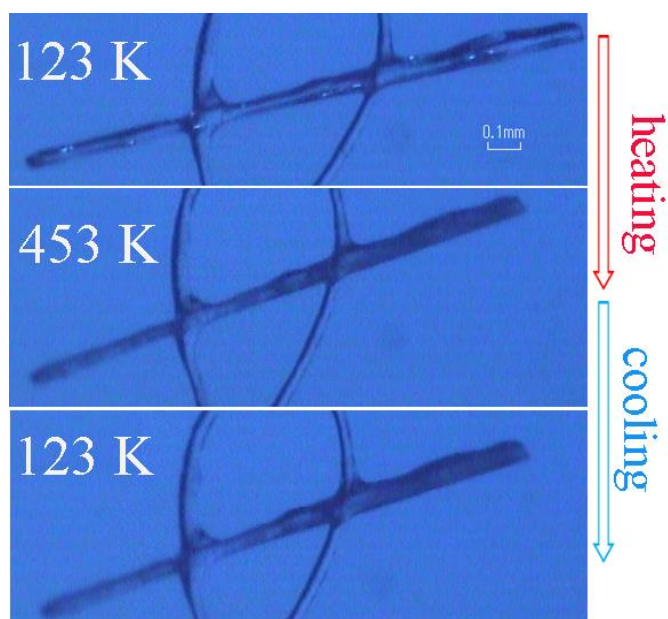

**Supplementary Figure 10.** Single-crystal photographs showing the thermally irreversible phase transition from compound **1o** to compound **1t**. A needle-shaped single crystal is mounted on a nylon loop, photographs of which are taken with a camera equipped on a Rigaku CCD diffractometer.

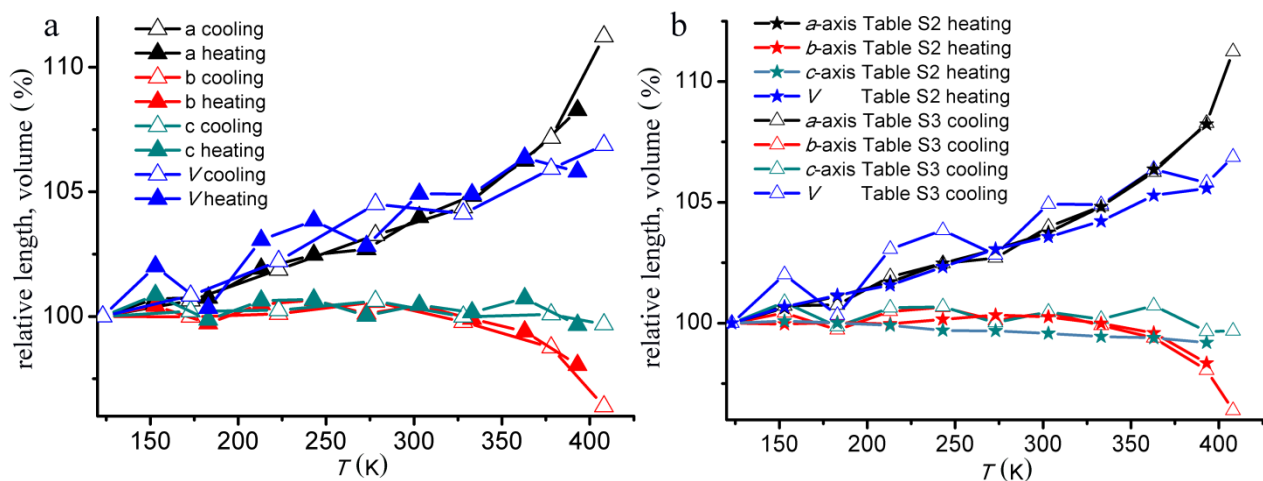

**Supplementary Figure 11.** **a**, Temperature-dependent unit cell parameters for compound **10** showing superior thermoelasticity. All parameters are normalized by those determined at 123 K, and the cell parameters are summarized in Supplementary Table 3. **b**, Plots showing that the temperature dependent change of the *a*, *b*, *c* parameters, and *V* for two different crystals is consistent with each other.

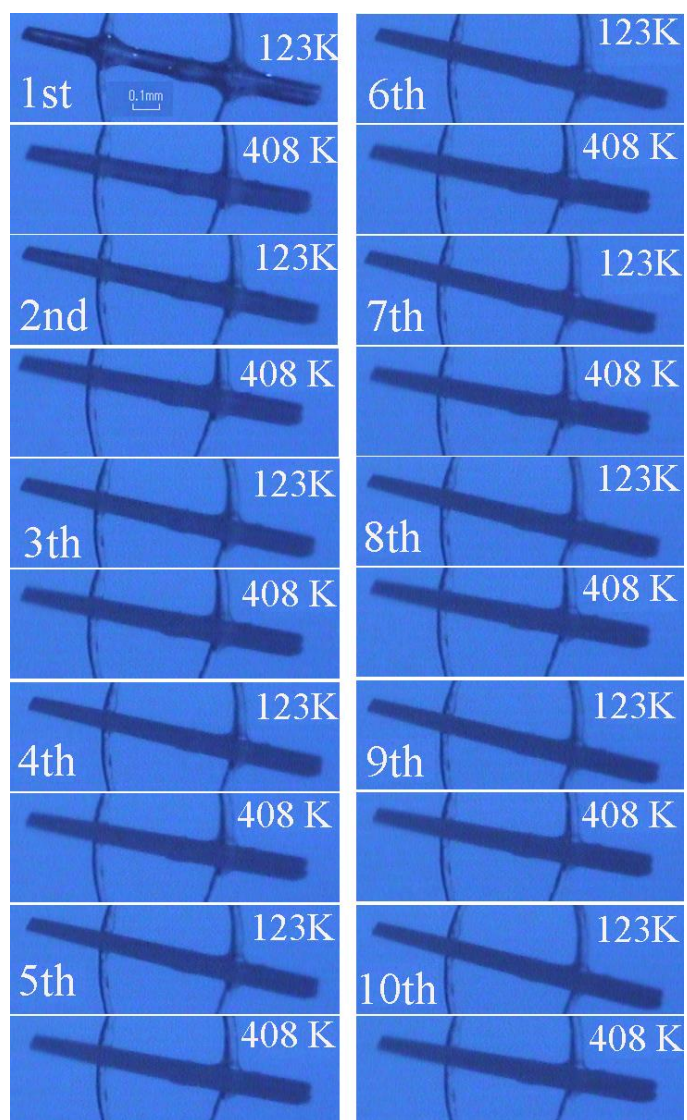

**Supplementary Figure 12.** Photographs of a needle-shaped single-crystal showing superior thermoelasticity for compound **1o**. The photographs of the crystal mounted on a nylon loop are taken with a camera equipped on a Rigaku CCD diffractometer.

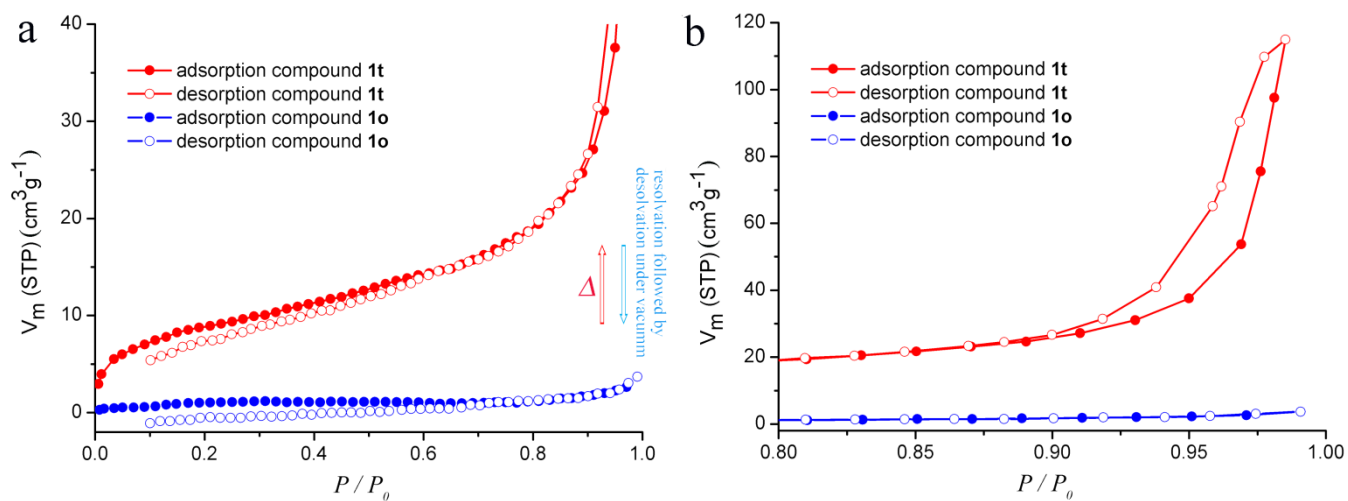

**Supplementary Figure 13.** **a**,  $\text{N}_2$  sorption isotherms for compound **1o** and **1t** at 77 K, and **b**, the isotherms at high relative pressure.

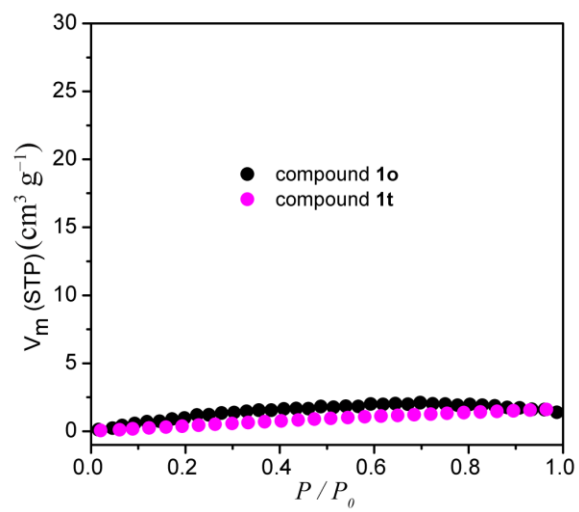

**Supplementary Figure 14.** CO<sub>2</sub> adsorption isotherms for compound **1o** and **1t** at 196 K.

**Supplementary Table 1.** Crystallographic data for compound **1o**·0.33DMF.

| Compound                                                                    | Compound <b>1o</b> ·0.33DMF                                   |
|-----------------------------------------------------------------------------|---------------------------------------------------------------|
| Formula                                                                     | C <sub>20</sub> H <sub>17</sub> N <sub>2</sub> O <sub>4</sub> |
| Fw                                                                          | 349.35                                                        |
| Crystal size(mm)                                                            | 0.12 × 0.06 × 0.06                                            |
| Space group                                                                 | Ccca                                                          |
| <i>a</i> = (Å)                                                              | 22.313(4)                                                     |
| <i>b</i> = (Å)                                                              | 26.967(5)                                                     |
| <i>c</i> = (Å)                                                              | 12.873(3)                                                     |
| <i>V</i> (Å <sup>3</sup> )                                                  | 7746(3)                                                       |
| <i>Z</i>                                                                    | 16                                                            |
| <i>D<sub>c</sub></i> (g/cm <sup>3</sup> )                                   | 1.198                                                         |
| <i>T</i> (K)                                                                | 123                                                           |
| <i>R</i> <sub>int</sub>                                                     | 0.0988                                                        |
| Parameters                                                                  | 271                                                           |
| <i>F</i> (000)                                                              | 2928                                                          |
| data collected                                                              | 24734                                                         |
| unique data                                                                 | 3448                                                          |
| <i>R</i> <sub>1</sub> , <i>wR</i> ( <i>I</i> > 2σ( <i>I</i> )) <sup>a</sup> | 0.1373, 0.3141                                                |
| <i>R</i> <sub>1</sub> , <i>wR</i> (all data) <sup>b</sup>                   | 0.1737, 0.3390                                                |
| Goodness-of-fit-on F <sup>2</sup>                                           | 1.074                                                         |
| CCDC <sup>#</sup>                                                           | 1423054                                                       |

$$^a R = \frac{\sum ||F_o| - |F_c||}{\sum |F_o|}$$

$$^b wR = \left[ \frac{\sum w(F_o - F_c)^2}{\sum w(F_o^2)^2} \right]^{1/2}$$

**Supplementary Table 2.** Crystallographic data for compound **1o** upon heating from 123 to 438 K and then cooling back to 123 K.

| <i>T</i> (K)                                                                | 123                                                           | 153                                                           | 183                                                           | 213                                                           | 243                                                           |
|-----------------------------------------------------------------------------|---------------------------------------------------------------|---------------------------------------------------------------|---------------------------------------------------------------|---------------------------------------------------------------|---------------------------------------------------------------|
| Formula                                                                     | C <sub>20</sub> H <sub>17</sub> N <sub>2</sub> O <sub>4</sub> | C <sub>20</sub> H <sub>17</sub> N <sub>2</sub> O <sub>4</sub> | C <sub>20</sub> H <sub>17</sub> N <sub>2</sub> O <sub>4</sub> | C <sub>20</sub> H <sub>17</sub> N <sub>2</sub> O <sub>4</sub> | C <sub>20</sub> H <sub>17</sub> N <sub>2</sub> O <sub>4</sub> |
| Fw                                                                          | 349.35                                                        | 349.35                                                        | 349.35                                                        | 349.35                                                        | 349.35                                                        |
| Crystal size(mm)                                                            | 0.14 × 0.09 × 0.09                                            | 0.14 × 0.09 × 0.09                                            | 0.14 × 0.09 × 0.09                                            | 0.14 × 0.09 × 0.09                                            | 0.14 × 0.09 × 0.09                                            |
| Space group                                                                 | Ccca                                                          | Ccca                                                          | Ccca                                                          | Ccca                                                          | Ccca                                                          |
| <i>a</i> = (Å)                                                              | 22.143(5)                                                     | 22.283(5)                                                     | 22.390(5)                                                     | 22.519(5)                                                     | 22.691(5)                                                     |
| <i>b</i> = (Å)                                                              | 26.947(6)                                                     | 26.935(6)                                                     | 26.954(6)                                                     | 26.938(6)                                                     | 26.989(6)                                                     |
| <i>c</i> (Å)                                                                | 12.880(3)                                                     | 12.891(3)                                                     | 12.880(3)                                                     | 12.867(3)                                                     | 12.841(3)                                                     |
| <i>V</i> (Å <sup>3</sup> )                                                  | 7685(3)                                                       | 7737(3)                                                       | 7773(3)                                                       | 7798(8)                                                       | 7864(3)                                                       |
| <i>Z</i>                                                                    | 16                                                            | 16                                                            | 16                                                            | 16                                                            | 16                                                            |
| <i>D<sub>c</sub></i> (g/cm <sup>3</sup> )                                   | 1.208                                                         | 1.200                                                         | 1.194                                                         | 1.189                                                         | 1.180                                                         |
| <i>R</i> <sub>int</sub>                                                     | 0.0525                                                        | 0.0542                                                        | 0.0481                                                        | 0.0796                                                        | 0.0511                                                        |
| Parameters                                                                  | 271                                                           | 271                                                           | 271                                                           | 271                                                           | 271                                                           |
| <i>F</i> (000)                                                              | 2928                                                          | 2928                                                          | 2928                                                          | 2928                                                          | 2928                                                          |
| data collected                                                              | 30135                                                         | 30548                                                         | 30582                                                         | 30712                                                         | 30876                                                         |
| unique data                                                                 | 3487                                                          | 3504                                                          | 3516                                                          | 3528                                                          | 3555                                                          |
| <i>R</i> <sub>1</sub> , <i>wR</i> ( <i>I</i> > 2σ( <i>I</i> )) <sup>a</sup> | 0.1475, 0.3733                                                | 0.1406, 0.3611                                                | 0.1362, 0.3340                                                | 0.1430, 0.3729                                                | 0.1347, 0.3316                                                |
| <i>R</i> <sub>1</sub> , <i>wR</i> (all data) <sup>b</sup>                   | 0.1628, 0.3849                                                | 0.1542, 0.3714                                                | 0.1499, 0.3442                                                | 0.1610, 0.3862                                                | 0.1542, 0.3453                                                |
| Goodness-of-fit-on <i>F</i> <sup>2</sup>                                    | 1.155                                                         | 1.170                                                         | 1.122                                                         | 1.126                                                         | 1.176                                                         |
| CCDC <sup>#</sup>                                                           | 1423057                                                       | 1423058                                                       | 1423059                                                       | 1423060                                                       | 1423061                                                       |
| <i>T</i> (K)                                                                | 273                                                           | 303                                                           | 333                                                           | 363                                                           | 393                                                           |
| Formula                                                                     | C <sub>20</sub> H <sub>17</sub> N <sub>2</sub> O <sub>4</sub> | C <sub>20</sub> H <sub>17</sub> N <sub>2</sub> O <sub>4</sub> | C <sub>20</sub> H <sub>17</sub> N <sub>2</sub> O <sub>4</sub> | C <sub>20</sub> H <sub>17</sub> N <sub>2</sub> O <sub>4</sub> | C <sub>20</sub> H <sub>17</sub> N <sub>2</sub> O <sub>4</sub> |
| Fw                                                                          | 349.35                                                        | 349.35                                                        | 349.35                                                        | 349.35                                                        | 349.35                                                        |
| Crystal size(mm)                                                            | 0.14 × 0.09 × 0.09                                            | 0.14 × 0.09 × 0.09                                            | 0.14 × 0.09 × 0.09                                            | 0.14 × 0.09 × 0.09                                            | 0.14 × 0.09 × 0.09                                            |
| Space group                                                                 | Ccca                                                          | Ccca                                                          | Ccca                                                          | Ccca                                                          | Ccca                                                          |
| <i>a</i> = (Å)                                                              | 22.819(6)                                                     | 22.975(5)                                                     | 23.210(5)                                                     | 23.552(6)                                                     | 23.966(8)                                                     |
| <i>b</i> = (Å)                                                              | 27.035(7)                                                     | 27.014(6)                                                     | 26.944(6)                                                     | 26.838(7)                                                     | 26.500(8)                                                     |
| <i>c</i> = (Å)                                                              | 12.839(3)                                                     | 12.824(3)                                                     | 12.808(3)                                                     | 12.801(3)                                                     | 12.776(4)                                                     |
| <i>V</i> (Å <sup>3</sup> )                                                  | 7920(4)                                                       | 7960(3)                                                       | 8009(3)                                                       | 8091(3)                                                       | 8114(4)                                                       |
| <i>Z</i>                                                                    | 16                                                            | 16                                                            | 16                                                            | 16                                                            | 16                                                            |
| <i>D<sub>c</sub></i> (g/cm <sup>3</sup> )                                   | 1.172                                                         | 1.166                                                         | 1.159                                                         | 1.147                                                         | 1.144                                                         |
| <i>R</i> <sub>int</sub>                                                     | 0.0507                                                        | 0.0523                                                        | 0.0552                                                        | 0.0565                                                        | 0.0695                                                        |
| Parameters                                                                  | 271                                                           | 271                                                           | 271                                                           | 271                                                           | 271                                                           |
| <i>F</i> (000)                                                              | 2928                                                          | 2928                                                          | 2928                                                          | 2928                                                          | 2928                                                          |
| data collected                                                              | 30861                                                         | 31177                                                         | 31497                                                         | 31821                                                         | 31684                                                         |
| unique data                                                                 | 3578                                                          | 3601                                                          | 3631                                                          | 3670                                                          | 3670                                                          |
| <i>R</i> <sub>1</sub> , <i>wR</i> ( <i>I</i> > 2σ( <i>I</i> )) <sup>a</sup> | 0.1438, 0.3428                                                | 0.1384, 0.3404                                                | 0.1385, 0.3228                                                | 0.1867, 0.4090                                                | 0.2317, 0.4529                                                |
| <i>R</i> <sub>1</sub> , <i>wR</i> (all data) <sup>b</sup>                   | 0.1693, 0.3594                                                | 0.1690, 0.3604                                                | 0.1713, 0.3425                                                | 0.2216, 0.4323                                                | 0.2650, 0.4740                                                |
| Goodness-of-fit-on <i>F</i> <sup>2</sup>                                    | 1.181                                                         | 1.205                                                         | 1.182                                                         | 1.213                                                         | 1.278                                                         |
| CCDC <sup>#</sup>                                                           | 1423062                                                       | 1423063                                                       | 1423064                                                       | 1423065                                                       | 1423066                                                       |
| <i>T</i> (K)                                                                | 438                                                           | 303*                                                          | 123*                                                          |                                                               |                                                               |



| Formula                                                                     | C <sub>20</sub> H <sub>17</sub> N <sub>2</sub> O <sub>4</sub> | C <sub>20</sub> H <sub>17</sub> N <sub>2</sub> O <sub>4</sub> | C <sub>20</sub> H <sub>17</sub> N <sub>2</sub> O <sub>4</sub> |
|-----------------------------------------------------------------------------|---------------------------------------------------------------|---------------------------------------------------------------|---------------------------------------------------------------|
| Fw                                                                          | 349.35                                                        | 349.35                                                        | 349.35                                                        |
| Crystal size(mm)                                                            | 0.14 × 0.09 × 0.09                                            | 0.14 × 0.09 × 0.09                                            | 0.14 × 0.09 × 0.09                                            |
| Space group                                                                 | P4 <sub>2</sub> /nbc                                          | P4 <sub>2</sub> /nbc                                          | P4 <sub>2</sub> /nbc                                          |
| <i>a</i> = (Å)                                                              | 17.856(6)                                                     | 17.491(9)                                                     | 17.289(6)                                                     |
| <i>b</i> = (Å)                                                              | 17.856(6)                                                     | 17.491(9)                                                     | 17.289(6)                                                     |
| <i>c</i> = (Å)                                                              | 12.787(7)                                                     | 12.915(7)                                                     | 12.957(4)                                                     |
| <i>V</i> (Å <sup>3</sup> )                                                  | 4077(3)                                                       | 3951(4)                                                       | 3873(2)                                                       |
| <i>Z</i>                                                                    | 16                                                            | 16                                                            | 16                                                            |
| <i>D<sub>c</sub></i> (g/cm <sup>3</sup> )                                   | 1.138                                                         | 1.175                                                         | 1.198                                                         |
| <i>R</i> <sub>int</sub>                                                     | 0.0965                                                        | 0.0945                                                        | 0.0999                                                        |
| Parameters                                                                  | 120                                                           | 119                                                           | 119                                                           |
| <i>F</i> (000)                                                              | 1464                                                          | 1464                                                          | 1464                                                          |
| data collected                                                              | 14093                                                         | 13652                                                         | 13627                                                         |
| unique data                                                                 | 1831                                                          | 1795                                                          | 1744                                                          |
| <i>R</i> <sub>1</sub> , <i>wR</i> ( <i>I</i> > 2σ( <i>I</i> )) <sup>a</sup> | 0.1735, 0.4425                                                | 0.2921, 0.6352                                                | 0.2856, 0.5842                                                |
| <i>R</i> <sub>1</sub> , <i>wR</i> (all data) <sup>b</sup>                   | 0.2123, 0.4742                                                | 0.3202, 0.6533                                                | 0.3197, 0.6084                                                |
| Goodness-of-fit-on <i>F</i> <sup>2</sup>                                    | 0.913                                                         | 0.935                                                         | 0.985                                                         |
| CCDC <sup>#</sup>                                                           | 1423067                                                       | 1423068                                                       | 1423069                                                       |

$$^a R = \frac{\sum ||F_o| - |F_c||}{\sum |F_o|}$$

$$^b wR = \left[ \frac{\sum w(F_o - F_c)^2}{\sum w(F_o^2)} \right]^{1/2}$$

\*The crystallographic data upon cooling back to 303 K and 123 K are very poor because of the deterioration of the crystal quality after heating at 438 K for 2 h for data collection..

**Supplementary Table 3.** Evolution of cell parameters for compound **1o** determined in a cooling and heating cycle from 408 to 123 K. The single crystal used for this measurement is different from that used for Table S2. Because the temperature of the single crystal for Table S2 was increased above phase transition temperature (438 K), it irreversibly transitioned to the tetragonal phase and the quality of the crystal is decreased. Therefore, a new single crystal was used to show reversible change in the crystal *a*, *b*, *c* parameters, and *V* below the phase transition temperature. As shown in Fig. S9(b), the temperature dependent change in the *a*, *b*, *c* parameters, and *V* is consistent with each other.

| <i>T</i> (K) | <i>a</i> (Å) | <i>b</i> (Å) | <i>c</i> (Å) | <i>V</i> (Å <sup>3</sup> ) |              |
|--------------|--------------|--------------|--------------|----------------------------|--------------|
| 408          | 24.9286      | 26.2659      | 12.8684      | 8425.8695                  | ↓<br>cooling |
| 378          | 24.0161      | 26.9108      | 12.9205      | 8350.4218                  |              |
| 328          | 23.3899      | 27.1903      | 12.9075      | 8208.8912                  |              |
| 278          | 23.1408      | 27.4100      | 12.9895      | 8239.1012                  |              |
| 223          | 22.8293      | 27.2762      | 12.9415      | 8058.6274                  |              |
| 173          | 22.5540      | 27.2458      | 12.9360      | 7949.1949                  |              |
| 123          | 22.4101      | 27.2503      | 12.9097      | 7883.7207                  |              |
| 153          | 22.5698      | 27.3647      | 13.0210      | 8041.9754                  | ↓<br>heating |
| 183          | 22.5783      | 27.1746      | 12.8921      | 7910.0288                  |              |
| 213          | 22.8402      | 27.3822      | 12.9918      | 8125.2656                  |              |
| 243          | 22.9639      | 27.4287      | 12.9974      | 8186.6713                  |              |
| 273          | 23.0141      | 27.2799      | 12.9125      | 8106.7561                  |              |
| 303          | 23.3027      | 27.3710      | 12.9694      | 8272.1194                  |              |
| 333          | 23.4940      | 27.2233      | 12.9308      | 8270.3355                  |              |
| 363          | 23.8110      | 27.0839      | 13.0030      | 8385.5663                  |              |
| 393          | 24.2660      | 26.7198      | 12.8652      | 8341.5727                  |              |

**Supplementary Table 4.** Thermal expansion coefficients for compound **1o** in a cooling and heating cycle between 408 and 123 K.

| $T(\text{K})$ | $\alpha_a(\times 10^{-6} \text{ K}^{-1})$ | $\alpha_b(\times 10^{-6} \text{ K}^{-1})$ | $\alpha_c(\times 10^{-6} \text{ K}^{-1})$ | $\beta_v(\times 10^{-6} \text{ K}^{-1})$ |
|---------------|-------------------------------------------|-------------------------------------------|-------------------------------------------|------------------------------------------|
| 123           |                                           |                                           |                                           |                                          |
| 153           | 238                                       |                                           |                                           | 669                                      |
| 173           | 128                                       |                                           |                                           | 166                                      |
| 183           | 125                                       |                                           |                                           | 56                                       |
| 213           | 213                                       |                                           |                                           | 340                                      |
| 223           | 187                                       |                                           |                                           | 222                                      |
| 243           | 206                                       |                                           |                                           | 320                                      |
| 273           | 180                                       |                                           |                                           | 189                                      |
| 278           | 210                                       |                                           |                                           | 291                                      |
| 303           | 221                                       |                                           |                                           | 273                                      |
| 328           | 213                                       |                                           |                                           | 201                                      |
| 333           | 230                                       |                                           |                                           | 234                                      |
| 363           | 260                                       | -171                                      |                                           | 265                                      |
| 378           | 281                                       | -255                                      | -422                                      | 232                                      |
| 393           | 307                                       | -308                                      | -353                                      | 215                                      |
| 408           | 394                                       | -469                                      | -230                                      | 241                                      |

All  $\alpha_a$  and  $\beta_v$  values were calculated relative to the parameters at 123 K. Therefore, the coefficient at each temperature  $T_i$  represents the thermal expansion over the temperature range from 123 K to  $T_i$ . All  $\alpha_b$  and  $\alpha_c$  values were calculated relative to the parameters at 333 K and 363 K, respectively.

**Supplementary Table 5.** Thermal expansion coefficients for compound **1o** between 333 and 408 K.

| $T(\text{K})$ | $\alpha_a(\times 10^{-6} \text{ K}^{-1})$ | $\alpha_b(\times 10^{-6} \text{ K}^{-1})$ | $\alpha_c(\times 10^{-6} \text{ K}^{-1})$ | $\beta_v(\times 10^{-6} \text{ K}^{-1})$ |
|---------------|-------------------------------------------|-------------------------------------------|-------------------------------------------|------------------------------------------|
| 333           |                                           |                                           |                                           |                                          |
| 363           | 450                                       | -171                                      |                                           | 464                                      |
| 378           | 494                                       | -255                                      | -422                                      | 215                                      |
| 393           | 548                                       | -308                                      | -353                                      | 143                                      |
| 408           | 814                                       | -469                                      | -230                                      | 251                                      |

All  $\alpha_a$ ,  $\alpha_b$  and  $\beta_v$  values were calculated relative to the parameters at 333 K. All  $\alpha_c$  values were calculated relative to the parameters at 363 K.

**Supplementary Table 6.** Comparison of thermal expansion coefficients for selected materials.

| Compound                                                 | $T$ (K)  | $\alpha_{\text{PTE}} (\times 10^{-6} \text{ K}^{-1})$ | $\alpha_{\text{NTE}} (\times 10^{-6} \text{ K}^{-1})$ | Reference |
|----------------------------------------------------------|----------|-------------------------------------------------------|-------------------------------------------------------|-----------|
| $\text{Ag}_3\text{Co}(\text{CN})_6$                      | 10~500   | 132                                                   | -130                                                  | 1         |
| $\text{ZrW}_2\text{O}_8$                                 | 0.3~1050 | NA                                                    | -9.1                                                  | 2         |
| $[\text{Ag}(\text{en})]\text{NO}_3\text{-I}$             | 120~360  | 149                                                   | -90                                                   | 3         |
| $\text{Cd}(\text{im})$                                   | 100~300  | 93                                                    | -23                                                   | 4         |
| $\text{Ag}(\text{mim})$                                  | 20~300   | 130                                                   | -25                                                   | 5         |
| $[\text{Zn}(\text{OH})(\text{niba})]$                    | 100~370  | 137                                                   | NA                                                    | 6         |
| $[\text{Zn}(\text{OH})(\text{niba})]\cdot\text{MeOH}$    | 100~370  | 166                                                   | NA                                                    | 6         |
| $[\text{Zn}(\text{OH})(\text{niba})]\cdot i\text{-PrOH}$ | 100~370  | 76                                                    | NA                                                    | 6         |
| HMOF-1                                                   | 100~380  | 177                                                   | NA                                                    | 7         |
| FMOF-1                                                   | 90~295   | 230                                                   | -170                                                  | 8         |
| MCF-18                                                   | 119~295  | 81                                                    | NA                                                    | 9         |
| MCF-18·DMF                                               | 119~295  | 12~242                                                | NA                                                    | 9         |
| MCF-18·MeOH                                              | 119~295  | 81~437                                                | NA                                                    | 9         |
| MCF-34                                                   | 127~673  | 224                                                   | -107                                                  | 10        |
| MCF-34·DMF                                               | 127~445  | 152 or 237                                            | -56 or -116                                           | 10        |
| MCF-82                                                   | 112~300  | 482                                                   | -218                                                  | 11        |
| ( <i>S,S</i> )-Octa-3,5-diyn-2,7-dio                     | 225~330  | 156~515                                               | -85                                                   | 12        |
| 2(4PazP):(4,6-diCl res)                                  | 260~290  | 316                                                   | -116                                                  | 13        |
| aspirin                                                  | 93~323   | 93                                                    | NA                                                    | 14        |
| PHA- $\alpha$                                            | 223~348  | 260                                                   | -80                                                   | 15        |
| Compound <b>1o</b>                                       | 123~408  | 125~394                                               | NA                                                    | This work |
| Compound <b>1o</b>                                       | 333~408  | 450~814                                               | -171 ~ -469                                           | This work |

**Supplementary Table 7.** Structural parameters  $\varphi$ ,  $\theta$ ,  $\eta$ ,  $\delta$ , and  $\kappa$  for compound **1o** during a heating and cooling cycle from 123 to 438 K and then back to 123 K.

| $T(\text{K})$ | $\varphi$ | $\theta$ | $\eta$ | $\delta$ | $\kappa$ |                                                                                     |
|---------------|-----------|----------|--------|----------|----------|-------------------------------------------------------------------------------------|
| 123           | 53.68     | 85.2     | 165.1  | 70.9     | 18.1     |  |
| 153           | 53.88     | 86.2     | 164.1  | 71.8     | 19.4     |                                                                                     |
| 183           | 54.26     | 86.2     | 164.8  | 71.8     | 19.1     |                                                                                     |
| 213           | 54.15     | 89.2     | 163.4  | 74.6     | 19.5     |                                                                                     |
| 243           | 54.20     | 89.0     | 164.0  | 74.5     | 19.9     |                                                                                     |
| 273           | 52.24     | 90.6     | 163.5  | 76.8     | 20.1     |                                                                                     |
| 303           | 52.97     | 93.0     | 162.2  | 79.0     | 22.2     |                                                                                     |
| 333           | 52.00     | 95.4     | 161.2  | 82.4     | 23.6     |                                                                                     |
| 363           | 51.28     | 100.3    | 158.9  | 91.7     | 26.5     |                                                                                     |
| 393           | 49.52     | 107.2    | 156.0  | 95.6     | 30.9     |                                                                                     |
| 438           | 45        | 117.9    | 117.9  | 107.7    | 107.7    |                                                                                     |
| 303           | 45        |          |        |          |          |  |
| 123           | 45        |          |        |          |          |                                                                                     |

### References for Table S6:

- 1 Goodwin, A. L., Calleja, M., Conterio, M. J., Dove, M. T., Evans, J. S. O., Keen, D. A., Peters, L. & Tucker, M. G. Colossal positive and negative thermal expansion in the framework material  $\text{Ag}_3[\text{Co}(\text{CN})_6]$ . *Science* **319**, 794–797 (2008).
- 2 Mary, T. A., Evans, J. S. O., Vogt, T. & Sleight, A. W. Negative thermal expansion from 0.3 to 1050 Kelvin in  $\text{ZrW}_2\text{O}_8$ . *Science* **272**, 90–92 (1996).
- 3 Cai, W. & Katrusiak, A. Giant negative linear compression positively coupled to massive thermal expansion in a metal-organic framework. *Nat. Commun.* **5**, 4811 (2014).
- 4 Collings, I. E., Cairns, A. B., Thompson, A. L., Parker, J. E., Tang, C. C., Tucker, M. G., Catafesta, J., Levelut, C., Haines, J., Dmitriev, V., Pattison, P., & Goodwin, A. L. Homologous critical behavior in the molecular framework  $\text{Zn}(\text{CN})_2$  and  $\text{Cd}(\text{imidazolate})_2$ . *J. Am. Chem. Soc.* **135**, 7610–7620 (2013).
- 5 Ogborn, J. M., Collings, I. E., Moggach, S. A., Thompson, A. L. & Goodwin, A. L. Supramolecular mechanics in a metal-organic framework. *Chem. Sci.* **3**, 3011–3017 (2012).
- 6 Grobler, I., Smith, V. J., Bhatt, P. M., Herbert, S. A. & Barbour, L. J. Turnable anisotropic thermal expansion of a porous zinc(II) metal-organic framework. *J. Am. Chem. Soc.* **135**, 6411–6414 (2013).
- 7 DeVries, I. D., Barron, P. M., Hurley, E. P., Hu, C. H. & Choe, W. "Nanoscale lattice fence" in a metal-organic framework: interplay between hinged topology and highly anisotropic thermal response. *J. Am. Chem. Soc.* **133**, 14848–14851 (2011).
- 8 Yang, C., Wang, X. P. & Omary, M. A. Crystallographic observation of dynamic gas adsorption sites and thermal expansion in a breathable fluorinated metal-organic framework. *Angew. Chem. Int. Ed.* **48**, 2500–2505 (2009).
- 9 Wei, Y. S., Chen, K. J., Liao, P. Q., Zhu, B. Y., Lin, R. B., Zhou, H. L., Wang, B. Y., Xue, W., Zhang, J. P. & Chen, X. M. Turning on the flexibility of isoreticular porous coordination frameworks for drastically tunable framework breathing and thermal expansion. *Chem. Sci.* **4**, 1539–1546 (2013).
- 10 Zhou, H. L., Lin, R. B., He, C. T., Zhang, Y. B., Feng, N. D., Wang, Q., Deng, F., Zhang, J. P. & Chen, X. M. Direct visualization of a guest-triggered crystal deformation based on a flexible ultramicroporous framework. *Nat. Commun.* **4**, 2534 (2013).
- 11 Zhou, H. L., Zhang, Y. B., Zhang, J. P. & Chen, X. M. Supramolecular-jack-like guest in ultramicroporous crystal for exceptional thermal expansion behavior. *Nat. Commun.* **6**, 6917 (2015).
- 12 Das, D., Jacobs, T. & Barbour, L. J. Exceptionally large positive and negative anisotropic thermal expansion of an organic crystalline material. *Nat. Mater.* **9**, 36–39 (2010).

- 13 Hutchins, K. M., Groeneman, R. H., Reinheimer, E. W., Swenson, D. C. & MacGillivray, L. R. Achieving dynamic behaviour and thermal expansion in the organic solid state via co-crystallization. *Chem. Sci.* **6**, 4717–4722 (2015).
- 14 Bauer, J. D., Haussühl, E., Winkler, B. & Arbeck, D. Elastic properties, thermal expansion, and polymorphism of acetylsalicylic acid. *Cryst. Growth. Des.* **10**, 3132–3140 (2010).
- 15 Panda, M. K., Runčevski, T., Chandra Sahoo, S., Belik, A. A., Nath, N. K., Dinnebier, R. E., & Naumov, P. Colossal positive and negative thermal expansion and thermosalient effect in a pentamorphic organometallic martensite. *Nat. Commun.* **5**, 4811 (2014).
